# Supplementary material for: Epidermal growth factor receptor status and Notch inhibition in non-small cell lung cancer cells
Source: PubMed Central journal article supplement (PMC4619334; doi:10.1186/s12929-015-0196-1), 2015-10-24
Supplement: 12929_2015_196_MOESM1_ESM.pdf [file 12929_2015_196_MOESM1_ESM.pdf]

## Additional file 1

**Table 1:** Classification of cells according to ATCC-LGC Promochem instructions [24], regarding tissue type of origin and EGFR mutation status.

| <i>NSCLC cell lines</i> | <i>Tissue type</i>      | <i>EGFR status</i> |
|-------------------------|-------------------------|--------------------|
| H23                     | Adenocarcinoma          | wt                 |
| A549                    | Squamous cell carcinoma | wt                 |
| H661                    | Large cell carcinoma    | wt                 |
| HCC827                  | Adenocarcinoma          | mt                 |

wt: wild type, mt: mutated
