# Supplementary material for: Epidermal growth factor receptor status and Notch inhibition in non-small cell lung cancer cells
Source: PubMed Central journal article supplement (PMC4619334; doi:10.1186/s12929-015-0196-1), 2015-10-24
Supplement: 12929_2015_196_MOESM2_ESM.pdf [file 12929_2015_196_MOESM2_ESM.pdf]

Additional file 2:

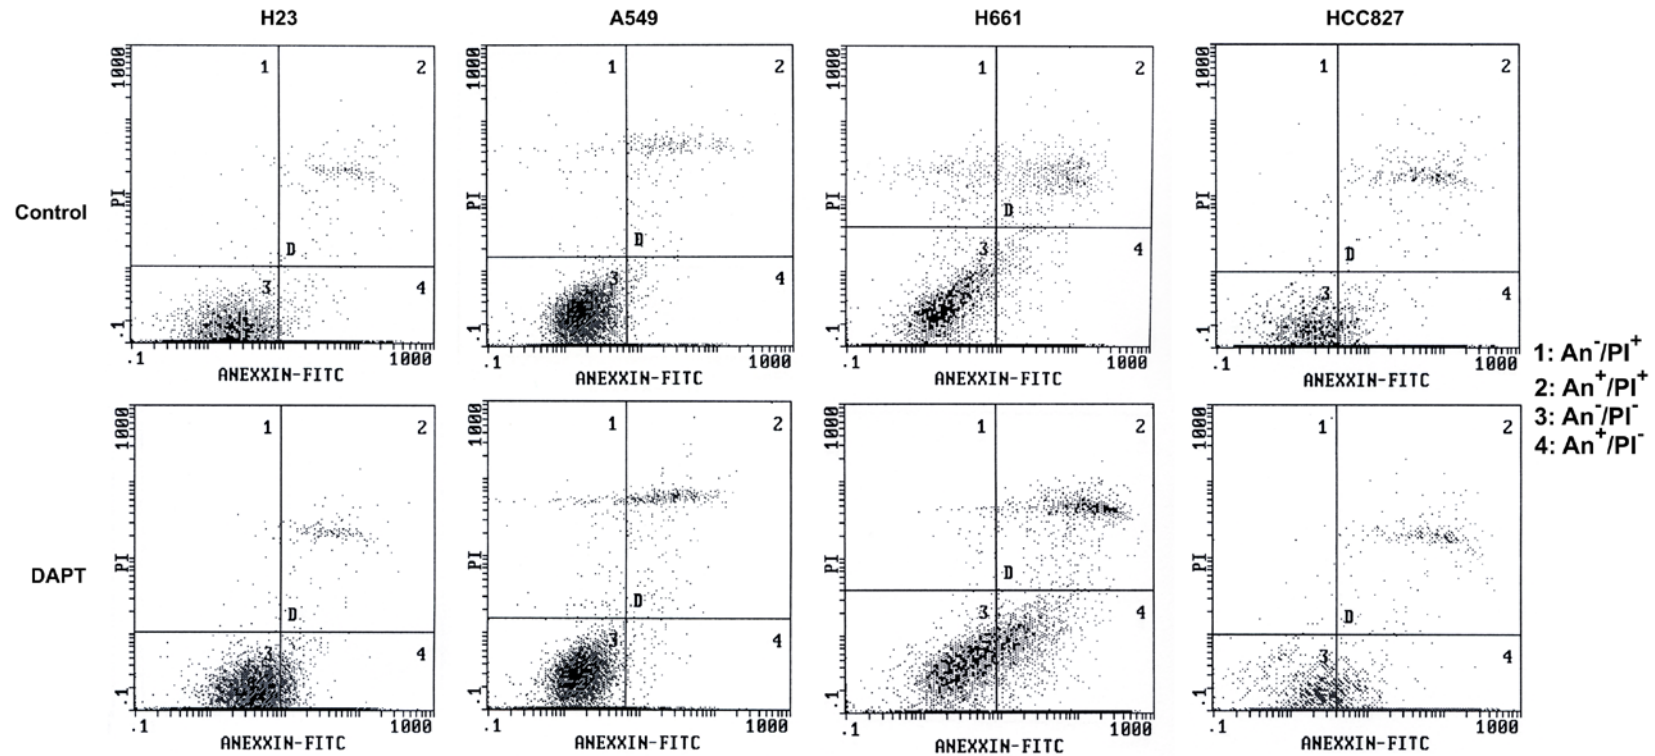

**Figure 1:** Representative plots for apoptosis and necrosis detection in H23, A549, H661 and HCC827 cells as described in “Materials and Methods” section. Control: untreated cells and DAPT: cells treated with DAPT. Four populations are distinguished: the viable ( $An^-/PI^-$ ) [region 3], the early apoptotic ( $An^+/PI^-$ ) [region 4], the late apoptotic ( $An^+/PI^+$ ) [region 2] and the necrotic ( $An^-/PI^+$ ) [region 1] cells.
