# Supplementary material for: Epidermal growth factor receptor status and Notch inhibition in non-small cell lung cancer cells
Source: PubMed Central journal article supplement (PMC4619334; doi:10.1186/s12929-015-0196-1), 2015-10-24
Supplement: 12929_2015_196_MOESM3_ESM.pdf [file 12929_2015_196_MOESM3_ESM.pdf]

**Additional file 3:**

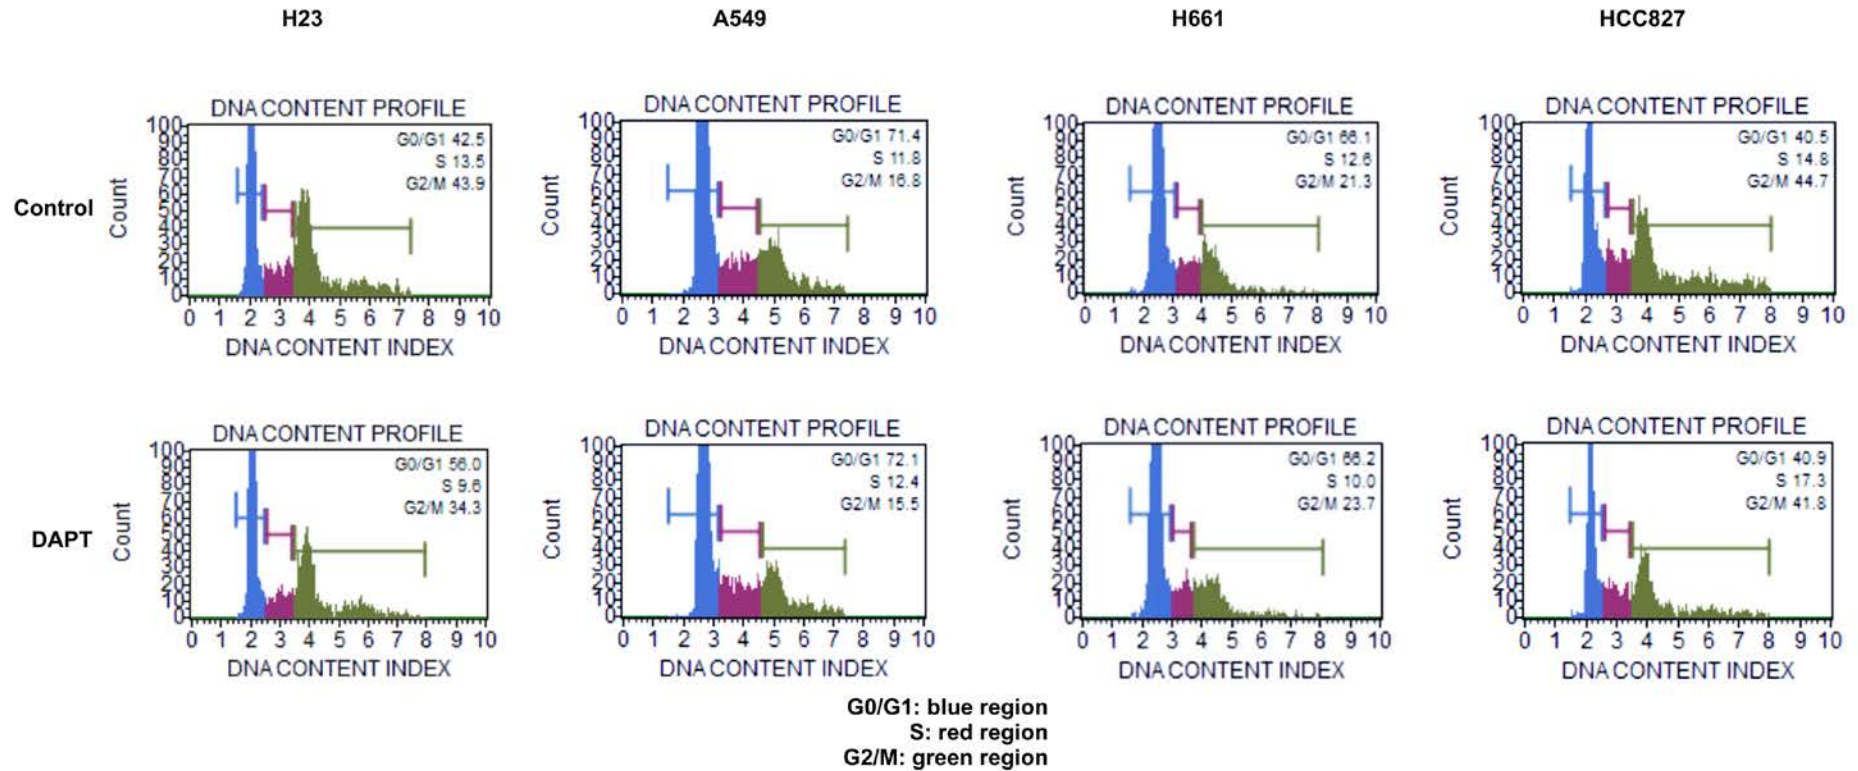

**Figure 2:** Representative plots for cell cycle analysis in H23, A549, H661 and HCC827 cells as described in “Materials and Methods” section. Control: untreated cells, DAPT: cells treated with DAPT. The G0/G1, S and G2/M phases are indicated with blue, red and green colour, respectively.
